# Supplementary material for: Swelling of PDMS networks in solvent vapours; applications for passive RFID wireless sensors
Source: Royal Society of Chemistry journal article supplement (doi:10.1039/c5tc01927c), 2015-01-01
Supplement: c5tc01927c1.pdf [file c5tc01927c1.pdf]

## Swelling of PDMS Networks in Solvent Vapours; Applications for Passive RFID Wireless Sensors

C. V. Rumens, M. A. Ziai, K. E. Belsey, J. C. Batchelor and S. J. Holder

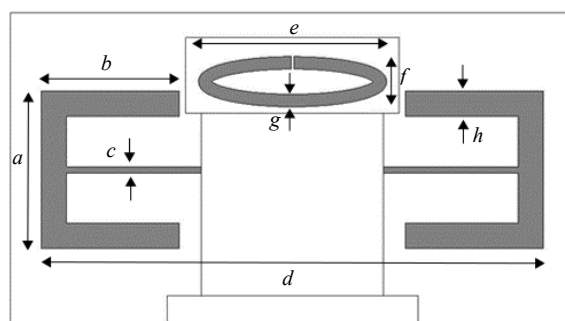

**Figure S1:** Displacement feed loop RFID tag antenna.  
Dimensions in Table S1

**Table S1:** Dimensions of feed loop RFID tag antenna.

| Symbol | Length (mm) |
|--------|-------------|
| $a$    | 25          |
| $b$    | 22          |
| $c$    | 1           |
| $d$    | 80          |
| $e$    | 14          |
| $f$    | 3           |
| $g$    | 2           |
| $h$    | 4           |

**Table S2:** Volume and weight swelling ratios, Hansen solubility parameters, Ra and ranking for each solvent. Ranking refers to the order of the solvent swelling ability with rank 1 being the best swelling solvent.

| Solvent         | Q <sub>V</sub> | Q <sub>W</sub> | Solvent vapour (mmol) | Hansen Solubility Parameters (MPa <sup>1/2</sup> ) |                |                |                | Ra (MPa <sup>1/2</sup> ) | Rank (Q <sub>V</sub> ) | Rank (Q <sub>W</sub> ) | Rank (mmol) | P <sub>VP</sub> (mmHg @ 20°C) |
|-----------------|----------------|----------------|-----------------------|----------------------------------------------------|----------------|----------------|----------------|--------------------------|------------------------|------------------------|-------------|-------------------------------|
|                 |                |                |                       | δ <sub>d</sub>                                     | δ <sub>p</sub> | δ <sub>h</sub> | δ <sub>t</sub> |                          |                        |                        |             |                               |
| Acetone         | 1.3<br>2       | 1.3<br>3       | 4.4                   | 15.<br>5                                           | 10.<br>4       | 7.0            | 19.<br>9       | 10.6                     | 9                      | 9                      | 8           | 181.0                         |
| Acetonitrile    | 1.0<br>6       | 1.0<br>2       | 0.4                   | 15.<br>3                                           | 18.<br>0       | 6.1            | 24.<br>2       | 18.0                     | 14                     | 15                     | 15          | 74.0                          |
| Butan-1-ol      | 1.1<br>3       | 1.1<br>4       | 1.3                   | 16.<br>0                                           | 5.7            | 15.<br>8       | 23.<br>2       | 12.4                     | 11                     | 11                     | 11          | 5.5                           |
| Chlorobenzene   | 1.5<br>2       | 1.7<br>5       | 5.4                   | 19.<br>0                                           | 4.3            | 2.0            | 19.<br>6       | 8.0                      | 7                      | 7                      | 7           | 11.7                          |
| Diethyl Ether   | 3.2<br>7       | 3.3<br>3       | 26.0                  | 14.<br>5                                           | 2.9            | 5.1            | 15.<br>6       | 4.0                      | 1                      | 2                      | 1           | 422.0                         |
| Ethanol         | 1.1<br>1       | 1.0<br>8       | 1.3                   | 15.<br>8                                           | 8.8            | 19.<br>4       | 26.<br>5       | 17.1                     | 12                     | 12                     | 12          | 44.3                          |
| Ethyl Acetate   | 1.7<br>5       | 1.9<br>0       | 8.6                   | 15.<br>8                                           | 5.3            | 7.2            | 18.<br>2       | 5.8                      | 5                      | 5                      | 5           | 73.0                          |
| Hexane          | 2.7<br>6       | 2.7<br>4       | 14.9                  | 14.<br>9                                           | 0.0            | 0.0            | 14.<br>9       | 5.1                      | 2                      | 3                      | 4           | 124.0                         |
| Methanol        | 1.0<br>3       | 1.0<br>4       | 0.8                   | 15.<br>1                                           | 12.<br>3       | 22.<br>3       | 29.<br>6       | 21.5                     | 15                     | 14                     | 14          | 96.0                          |
| DCM             | 2.2<br>9       | 3.3<br>7       | 22.7                  | 18.<br>2                                           | 6.3            | 6.1            | 20.<br>2       | 7.8                      | 4                      | 1                      | 2           | 350.0                         |
| Pentan-1-ol     | 1.0<br>7       | 1.0<br>8       | 0.8                   | 15.<br>9                                           | 5.9            | 13.<br>9       | 21.<br>9       | 10.9                     | 13                     | 13                     | 13          | 1.5                           |
| Propan-2-ol     | 1.2<br>6       | 1.2<br>2       | 2.9                   | 15.<br>8                                           | 6.1            | 16.<br>4       | 23.<br>6       | 13.2                     | 10                     | 10                     | 10          | 33.0                          |
| Tetrahydrofuran | 2.4<br>3       | 2.7<br>4       | 20.1                  | 16.<br>8                                           | 5.7            | 8.0            | 19.<br>5       | 6.7                      | 3                      | 4                      | 3           | 143.0                         |
| Toluene         | 1.7<br>2       | 1.8<br>1       | 7.1                   | 18.<br>0                                           | 1.4            | 2.0            | 18.<br>2       | 5.2                      | 6                      | 6                      | 6           | 22.0                          |
| Xylene          | 1.5<br>1       | 1.5<br>3       | 4.2                   | 17.<br>8                                           | 0.9            | 1.8            | 17.<br>9       | 4.8                      | 8                      | 8                      | 9           | 4.8                           |
| PDMS            | -              | -              | -                     | 15.<br>9                                           | 0.1            | 4.7            | 16.<br>6       | -                        | -                      | -                      | -           | -                             |

**Figure S2:** Moles of solvent vapour absorbed into elastomer after 72 hours exposure.

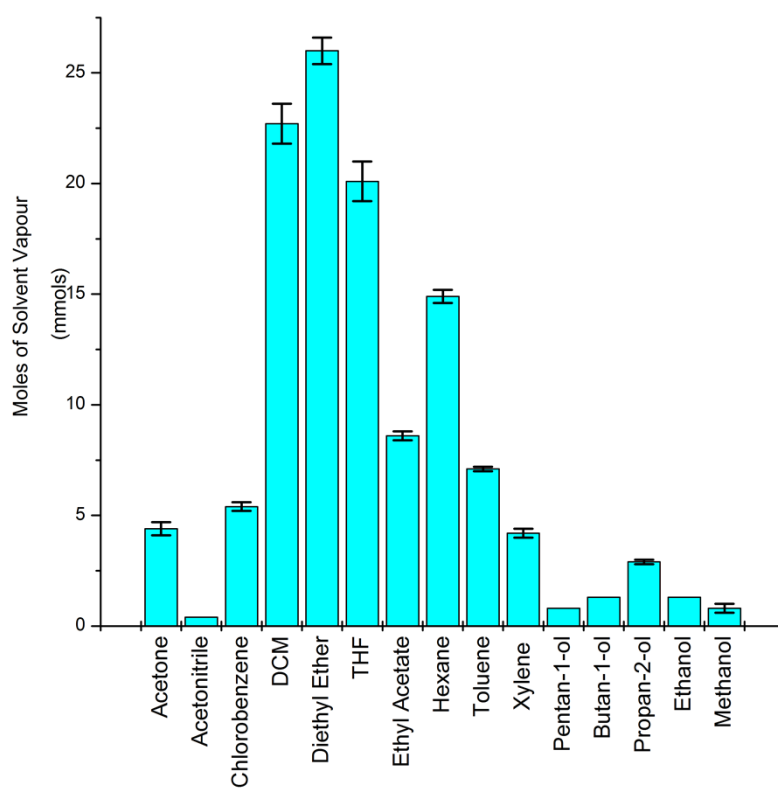

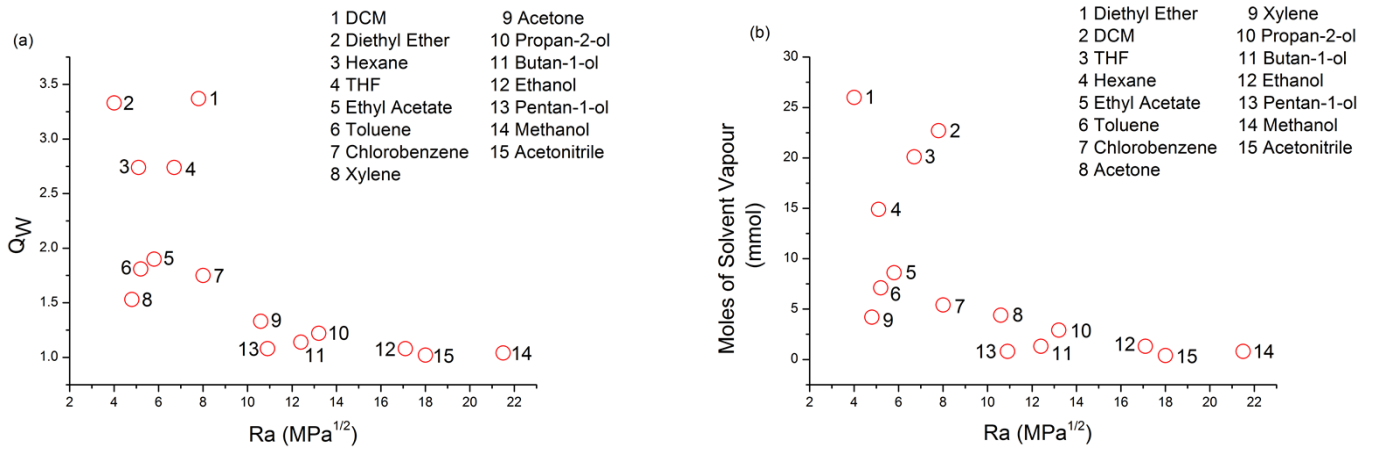

**Figure S3:** (a) Weight swelling ratio versus  $R_a$  for each solvent and (b) moles of solvent vapour absorbed by elastomer versus  $R_a$  for each solvent. The numbers relate to the ranking of the solvents swelling ability.

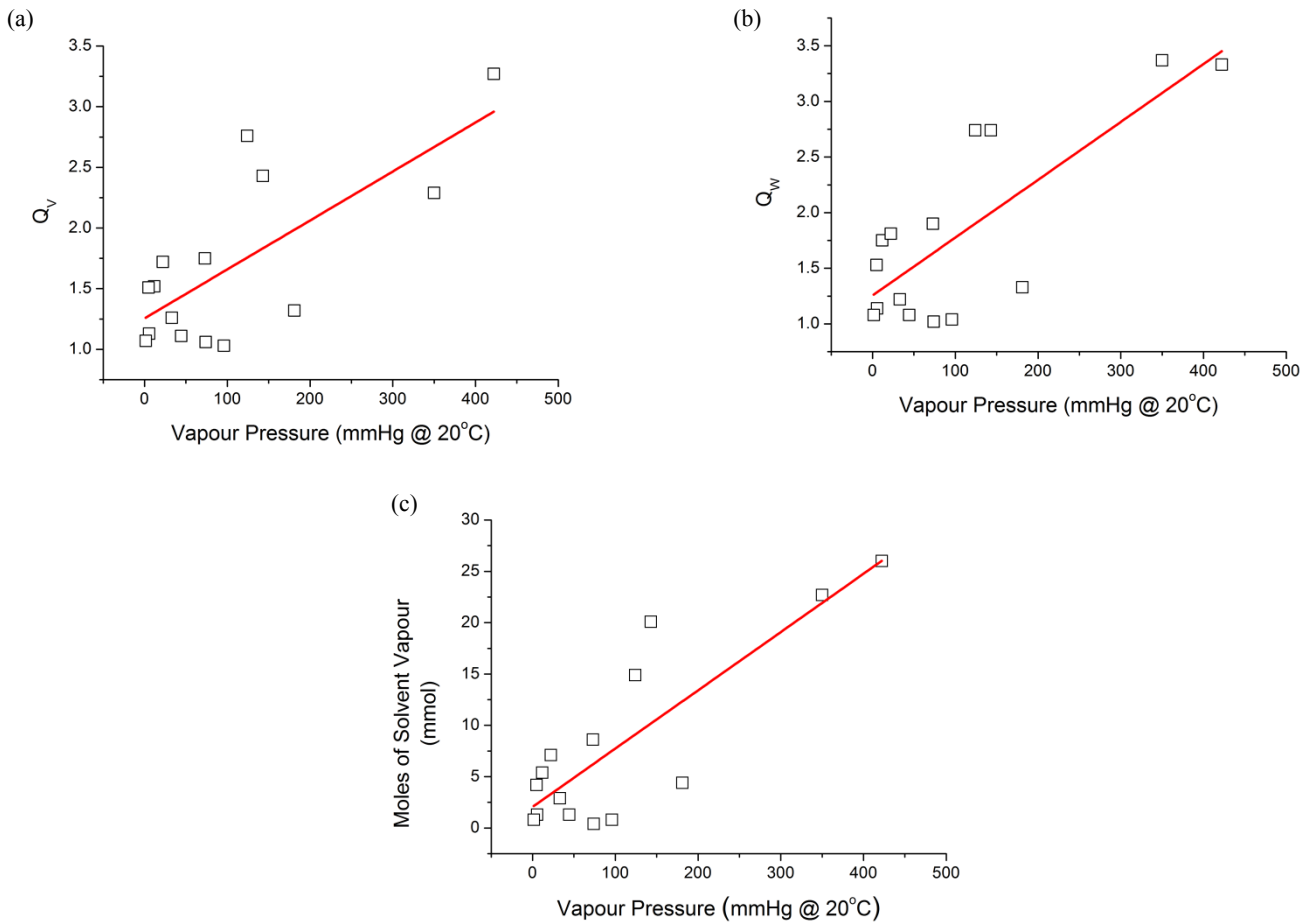

**Figure S4:** (a)  $Q_v$  versus vapour pressure (b)  $Q_w$  versus vapour pressure and (c) moles of solvent vapour in swollen elastomer versus vapour pressure.

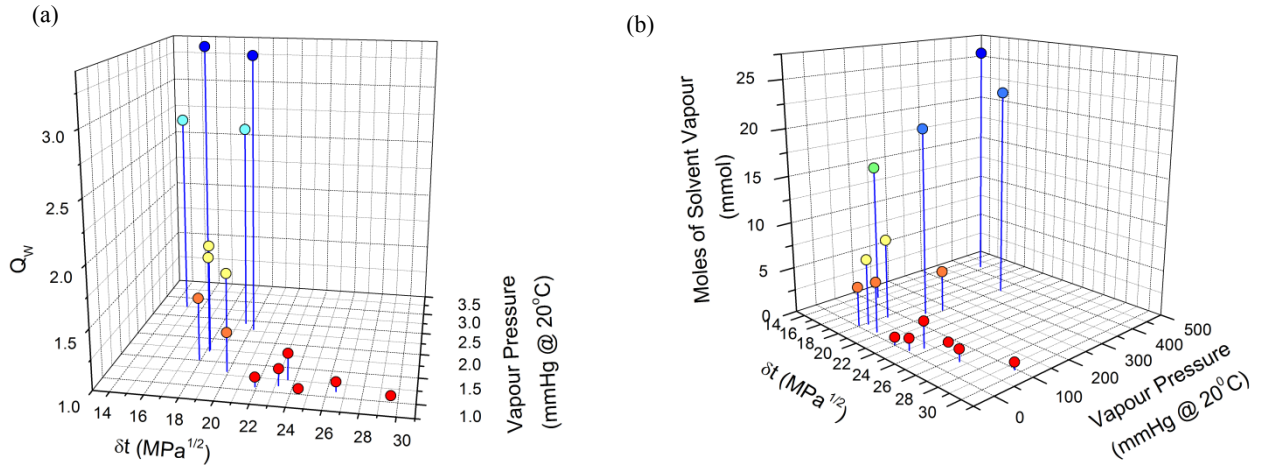

**Figure S5:** (a)  $Q_w$  versus the total Hansen solubility parameter and vapour pressure of each solvent (b) moles of solvent in swollen elastomer versus the total Hansen solubility parameter and vapour pressure of each solvent.

**Table S3:** Results from the linear regression analysis. The intercept and variables were used in equations 7 and 8 to predict swelling for  $Q_v$ .

|                               | $Q_v$                    |                          | $Q_w$                    |                          | Moles of Solvent Vapour |              |
|-------------------------------|--------------------------|--------------------------|--------------------------|--------------------------|-------------------------|--------------|
|                               | Eq 7                     | Eq 8                     | Eq7                      | Eq 8                     | Eq 7                    | Eq 8         |
| <b>R<sup>2</sup></b>          | 0.820032972              | 0.8870684                | 0.851629341              | 0.879732317              | -                       | -            |
| <b>Significance f</b>         | $3.39749 \times 10^{-5}$ | $9.98399 \times 10^{-5}$ | $1.06681 \times 10^{-5}$ | $1.35841 \times 10^{-4}$ | $4.65 \times 10^{-6}$   | 0.000192     |
| <b>Intercept (a)</b>          | 2.061165316              | 3.733022915              | 2.1428168                | 0.758810704              | 10.00094586             | -0.383922955 |
| <b>b<sub>Ra</sub></b>         | -0.071008207             | -                        | -0.078272575             | -                        | -0.700582178            |              |
| <b>b<math>\delta_d</math></b> | -                        | -0.105318594             | -                        | 0.06699796               | -                       | 0.459577803  |
| <b>b<math>\delta_p</math></b> | -                        | -0.069508359             | -                        | -0.063754836             | -                       | -0.606956017 |
| <b>b<math>\delta_h</math></b> | -                        | -0.029037386             | -                        | -0.020349323             | -                       | -0.128322476 |
| <b>b<sub>VP</sub></b>         | 0.00317938               | 0.00338831               | 0.004261646              | 0.005060529              | 0.048357022             | 0.055789896  |

$$Q_v = a + b_{Ra} * Ra + b_{PVP} * Pvp \quad (7)$$

$$Q_v = a + (b_{\delta_d} * \delta_d) + (b_{\delta_p} * \delta_p) + (b_{\delta_h} * \delta_h) + (b_{PVP} * Pvp) \quad (8)$$

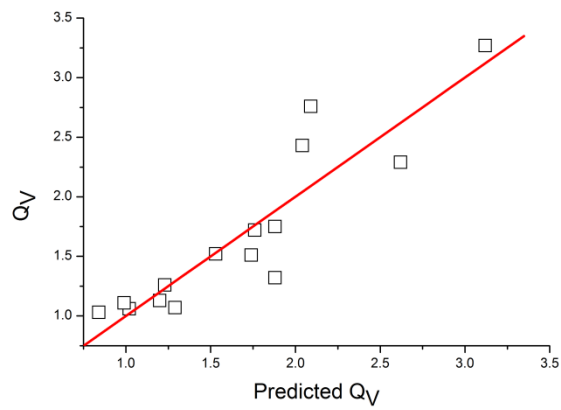

**Figure S6:** Measured volume swelling ratio versus predicted swelling ratio calculated using results from linear regression analysis.  $R_a$  and vapour pressure variables used (equation 7).

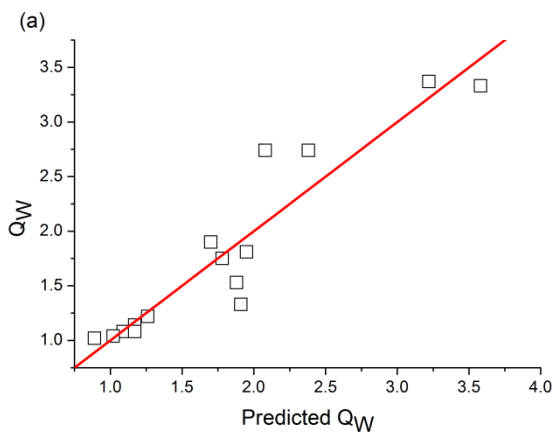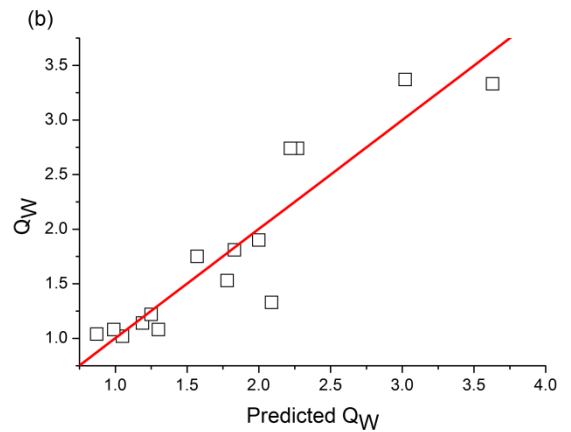

**Figure S7:** (a) Measured weight swelling ratio versus predicted weight swelling ratio using results from linear regression analysis.  $\delta_d, \delta_p, \delta_h$  and vapour pressure variables used (equation 8) (b) Measured weight swelling ratio versus predicted weight swelling ratio using results from linear regression analysis.  $R_a$  and vapour pressure variables used (equation 7).

(a)

(b)

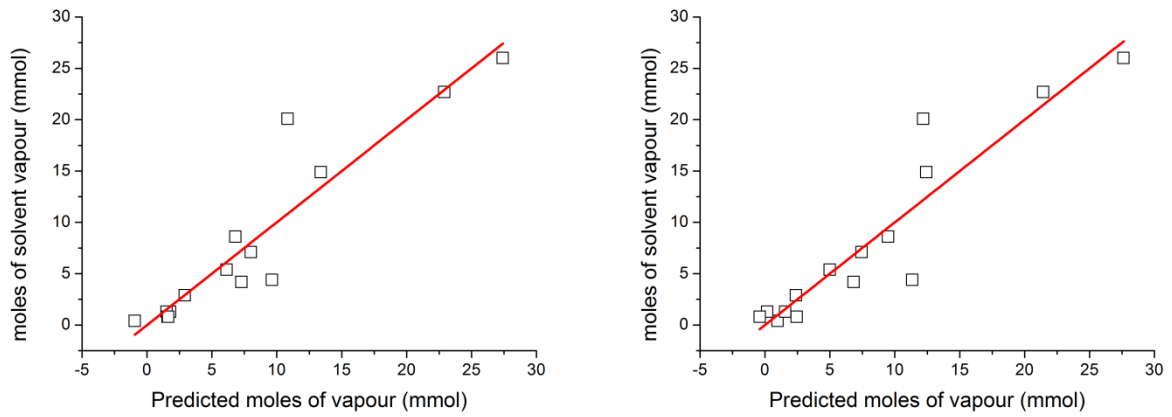

**Figure S8 :** (a) Measured moles of solvent vapour in swollen elastomer versus predicted moles of vapour using results from linear regression analysis.  $\delta_d$ ,  $\delta_p$ ,  $\delta_h$  and vapour pressure variables used (equation 8) (b) Measured moles of solvent vapour in swollen elastomer versus predicted moles of vapour using results from linear regression analysis.  $R_a$  and vapour pressure variables used (equation 7).

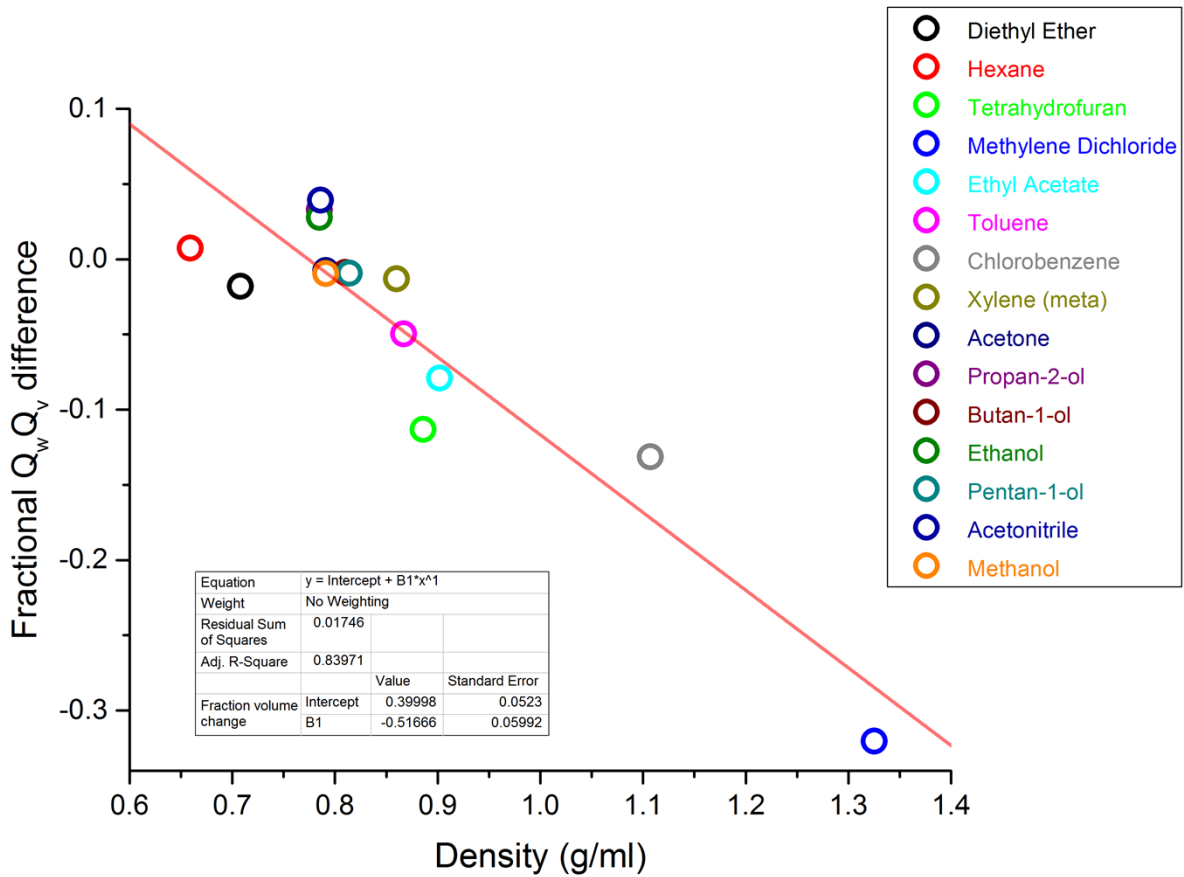

**Figure S9 :** Variation in fractional difference,  $(Q_v/Q_w)-1$ , between  $Q_v$  and  $Q_w$  with solvent density.
